# Supplementary material
Source: PubMed Central journal article supplement (PMC7084139)
Supplement: pnas.1921187117.sapp.pdf [file pnas.1921187117.sapp.pdf]

## Supplementary Information

### Analysis of *KLHL14* mutations in patients with lymphoid malignancies

Published whole exome and whole genome sequencing data were compiled from the following sources:

BL (1-4)  
CLL (5-10)  
DLBCL (11-25)  
FL (26-32)  
MCL (33-36)  
MM (37, 38)  
MZL (39-46)  
Primary\_CNS (47-50)  
Primary\_cutaneous (17, 51)  
T\_cell\_lymphoma (52-72)

Analysis of *KLHL14* prevalence within DLBCL gene expression subgroups and genetic subtypes was based on data in ref. (18).

**Fig. S1**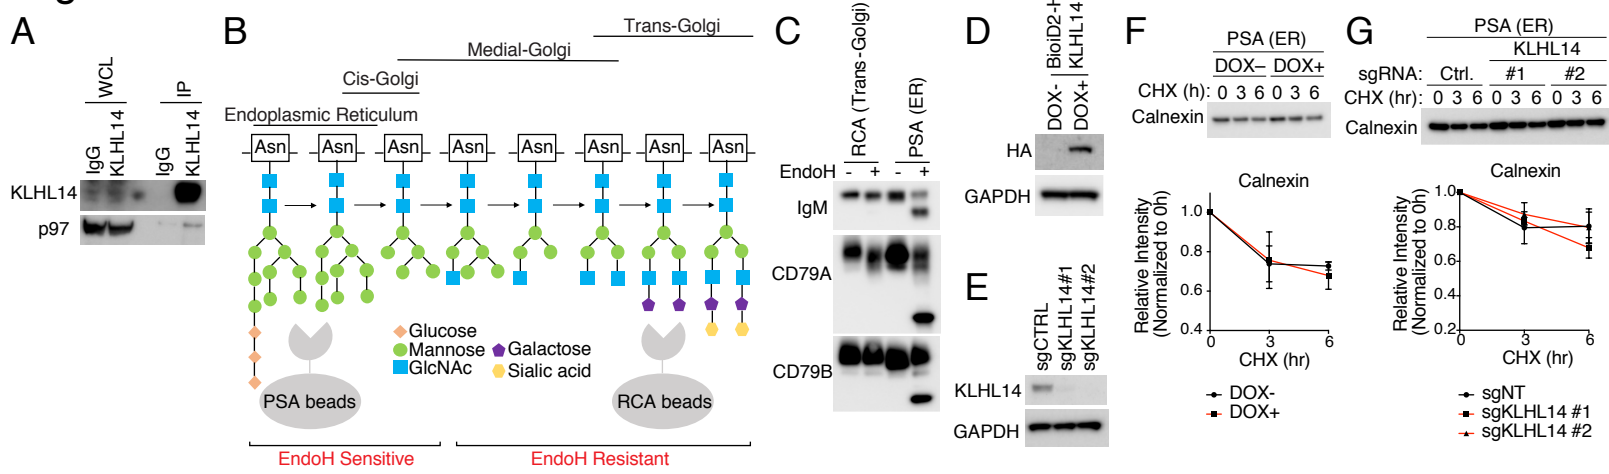**Fig. S1. KLHL14 decreases stability of the immature BCR glycoforms in the ER**

(A) Western blot analysis of immunoprecipitated endogenous KLHL14 in TMD8 cells.

IgG antibody immunoprecipitates = negative control: IP, immunoprecipitated; WCL, whole cell lysates.

(B) Diagram showing glycan processing in the ER and Golgi and lectin affinity chromatography.

(C) Western blot analysis of PSA- and RCA-bound fractions of BCR in TMD8 cells treated with or without EndoH.

(D) Western blot analysis of whole cell lysates from tetracycline repressor-expressing TMD8 cells retrovirally transduced with cDNAs encoding BioID2-HA-tagged KLHL14. Cells were treated with DOX (1  $\mu$ g/ml) for 16h.

(E) Western blot analysis of whole cell lysates from TMD8-Cas9 lentivirally transduced with sgRNA targeting KLHL14 or a non-targeting control.

(F) Top, western blot analysis of PSA-bound fractions of Calnexin in tetracycline repressor-expressing TMD8 cells retrovirally transduced with cDNAs encoding BioID2-HA-tagged KLHL14. Cells were pre-treated with DOX (1  $\mu$ g/ml) for 16h and treated with CHX (50  $\mu$ g/ml) for the indicated time points before fractionation.

Bottom, quantification of PSA-bound fraction of Calnexin protein levels.

(G) Top, western blot analysis of PSA-bound fractions of Calnexin in TMD8-Cas9 cells lentivirally transduced with sgRNA targeting KLHL14 or a non-targeting control. Cells were treated with CHX (50  $\mu$ g/ml) for the indicated time points before fractionation.

Bottom, quantification of PSA-bound fraction of Calnexin protein levels. Error bars represent SD of triplicates and data are representative of three independent experiments.

**Dataset S1. Global Proteome SILAC enrichment ratio**

Differential protein expression upon KLHL14 expression (averaged normalized SILAC ratios (KLHL14/empty vector)) identified by quantitative mass spectrometry in TMD8 cells

**Dataset S2. Ubiquitinome SILAC enrichment ratio**

Differentially ubiquitinated proteins upon KLHL14 expression (averaged normalized SILAC ratios (KLHL14/empty vector)) identified by di-glycine remnant quantitative mass spectrometry in TMD8 cells

**Dataset S3. Brunello sgRNA library normalized read counts**

Normalized gRNA sequencing read counts from the genome-scale CRISPR-Cas9 screen in DMSO- or ibrutinib-treated KLHL14 wild-type (WT) and KLHL14 knockout (KO) TMD8 cells

**Dataset S4. Ibrutinib synergy score**

Average fold-change in the log<sub>2</sub>-transformed normalized gRNA sequencing read counts from Dataset S3

**Dataset S5. DGE for RNA-Seq**

The RNA-seq digital gene expression values in DMSO- or ibrutinib-treated KLHL14 wild-type (WT) and KLHL14 knockout (KO) TMD8 cells

## SI References

1. Grande BM, *et al.* (2019) Genome-wide discovery of somatic coding and noncoding mutations in pediatric endemic and sporadic Burkitt lymphoma. *Blood* 133(12):1313-1324.
2. Bouska A, *et al.* (2017) Adult high-grade B-cell lymphoma with Burkitt lymphoma signature: genomic features and potential therapeutic targets. *Blood* 130(16):1819-1831.
3. Love C, *et al.* (2012) The genetic landscape of mutations in Burkitt lymphoma. *Nat Genet* 44(12):1321-1325.
4. Richter J, *et al.* (2012) Recurrent mutation of the ID3 gene in Burkitt lymphoma identified by integrated genome, exome and transcriptome sequencing. *Nat Genet* 44(12):1316-1320.
5. Amin NA, *et al.* (2016) A Quantitative Analysis of Subclonal and Clonal Gene Mutations before and after Therapy in Chronic Lymphocytic Leukemia. *Clin Cancer Res* 22(17):4525-4535.
6. Ljungstrom V, *et al.* (2016) Whole-exome sequencing in relapsing chronic lymphocytic leukemia: clinical impact of recurrent RPS15 mutations. *Blood* 127(8):1007-1016.
7. Landau DA, *et al.* (2015) Mutations driving CLL and their evolution in progression and relapse. *Nature* 526(7574):525-530.
8. Puente XS, *et al.* (2015) Non-coding recurrent mutations in chronic lymphocytic leukaemia. *Nature* 526(7574):519-524.
9. Quesada V, *et al.* (2011) Exome sequencing identifies recurrent mutations of the splicing factor SF3B1 gene in chronic lymphocytic leukemia. *Nat Genet* 44(1):47-52.
10. Wang L, *et al.* (2011) SF3B1 and other novel cancer genes in chronic lymphocytic leukemia. *N Engl J Med* 365(26):2497-2506.
11. Arthur SE, *et al.* (2018) Genome-wide discovery of somatic regulatory variants in diffuse large B-cell lymphoma. *Nat Commun* 9(1):4001.
12. Dobashi A, *et al.* (2018) TP53 and OSBPL10 alterations in diffuse large B-cell lymphoma: prognostic markers identified via exome analysis of cases with extreme prognosis. *Oncotarget* 9(28):19555-19568.
13. Greenawalt DM, *et al.* (2017) Comparative analysis of primary versus relapse/refractory DLBCL identifies shifts in mutation spectrum. *Oncotarget* 8(59):99237-99244.
14. Chapuy B, *et al.* (2016) Diffuse large B-cell lymphoma patient-derived xenograft models capture the molecular and biological heterogeneity of the disease. *Blood* 127(18):2203-2213.
15. de Miranda NF, *et al.* (2014) Exome sequencing reveals novel mutation targets in diffuse large B-cell lymphomas derived from Chinese patients. *Blood* 124(16):2544-2553.
16. Lohr JG, *et al.* (2012) Discovery and prioritization of somatic mutations in diffuse large B-cell lymphoma (DLBCL) by whole-exome sequencing. *Proc Natl Acad Sci U S A* 109(10):3879-3884.
17. Zhou XA, *et al.* (2018) Genomic Analyses Identify Recurrent Alterations in Immune Evasion Genes in Diffuse Large B-Cell Lymphoma, Leg Type. *J Invest Dermatol* 138(11):2365-2376.

18. Schmitz R, *et al.* (2018) Genetics and Pathogenesis of Diffuse Large B-Cell Lymphoma. *N Engl J Med* 378(15):1396-1407.
19. Reddy A, *et al.* (2017) Genetic and Functional Drivers of Diffuse Large B Cell Lymphoma. *Cell* 171(2):481-494 e415.
20. Park HY, *et al.* (2016) Whole-exome and transcriptome sequencing of refractory diffuse large B-cell lymphoma. *Oncotarget* 7(52):86433-86445.
21. Morin RD, *et al.* (2016) Genetic Landscapes of Relapsed and Refractory Diffuse Large B-Cell Lymphomas. *Clin Cancer Res* 22(9):2290-2300.
22. Mareschal S, *et al.* (2016) Whole exome sequencing of relapsed/refractory patients expands the repertoire of somatic mutations in diffuse large B-cell lymphoma. *Genes Chromosomes Cancer* 55(3):251-267.
23. Morin RD, *et al.* (2013) Mutational and structural analysis of diffuse large B-cell lymphoma using whole-genome sequencing. *Blood* 122(7):1256-1265.
24. Pasqualucci L, *et al.* (2011) Analysis of the coding genome of diffuse large B-cell lymphoma. *Nat Genet* 43(9):830-837.
25. Chapuy B, *et al.* (2018) Molecular subtypes of diffuse large B cell lymphoma are associated with distinct pathogenic mechanisms and outcomes. *Nat Med* 24(5):679-690.
26. Hellmuth JC, *et al.* (2018) Duodenal-type and nodal follicular lymphomas differ by their immune microenvironment rather than their mutation profiles. *Blood* 132(16):1695-1702.
27. Tsukamoto T, *et al.* (2017) High-risk follicular lymphomas harbour more somatic mutations including those in the AID-motif. *Sci Rep* 7(1):14039.
28. Zamo A, *et al.* (2018) Differences between BCL2-break positive and negative follicular lymphoma unraveled by whole-exome sequencing. *Leukemia* 32(3):685-693.
29. Bouska A, *et al.* (2017) Combined copy number and mutation analysis identifies oncogenic pathways associated with transformation of follicular lymphoma. *Leukemia* 31(1):83-91.
30. Green MR, *et al.* (2015) Mutations in early follicular lymphoma progenitors are associated with suppressed antigen presentation. *Proc Natl Acad Sci U S A* 112(10):E1116-1125.
31. Pasqualucci L, *et al.* (2014) Genetics of follicular lymphoma transformation. *Cell reports* 6(1):130-140.
32. Green MR, *et al.* (2013) Hierarchy in somatic mutations arising during genomic evolution and progression of follicular lymphoma. *Blood* 121(9):1604-1611.
33. Agarwal R, *et al.* (2019) Dynamic molecular monitoring reveals that SWI-SNF mutations mediate resistance to ibrutinib plus venetoclax in mantle cell lymphoma. *Nat Med* 25(1):119-129.
34. Wu C, *et al.* (2016) Genetic heterogeneity in primary and relapsed mantle cell lymphomas: Impact of recurrent CARD11 mutations. *Oncotarget* 7(25):38180-38190.
35. Zhang J, *et al.* (2014) The genomic landscape of mantle cell lymphoma is related to the epigenetically determined chromatin state of normal B cells. *Blood* 123(19):2988-2996.
36. Bea S, *et al.* (2013) Landscape of somatic mutations and clonal evolution in mantle cell lymphoma. *Proc Natl Acad Sci U S A* 110(45):18250-18255.

37. Guo G, *et al.* (2018) Genomic discovery and clonal tracking in multiple myeloma by cell-free DNA sequencing. *Leukemia* 32(8):1838-1841.
38. Bolli N, *et al.* (2014) Heterogeneity of genomic evolution and mutational profiles in multiple myeloma. *Nat Commun* 5:2997.
39. Hyeon J, *et al.* (2018) Targeted deep sequencing of gastric marginal zone lymphoma identified alterations of TRAF3 and TNFAIP3 that were mutually exclusive for MALT1 rearrangement. *Modern pathology : an official journal of the United States and Canadian Academy of Pathology, Inc* 31(9):1418-1428.
40. Pillonel V, *et al.* (2018) High-throughput sequencing of nodal marginal zone lymphomas identifies recurrent BRAF mutations. *Leukemia* 32(11):2412-2426.
41. Spina V, *et al.* (2016) The genetics of nodal marginal zone lymphoma. *Blood* 128(10):1362-1373.
42. Clipson A, *et al.* (2015) KLF2 mutation is the most frequent somatic change in splenic marginal zone lymphoma and identifies a subset with distinct genotype. *Leukemia* 29(5):1177-1185.
43. Parry M, *et al.* (2013) Whole exome sequencing identifies novel recurrently mutated genes in patients with splenic marginal zone lymphoma. *PLoS One* 8(12):e83244.
44. Martinez N, *et al.* (2014) Whole-exome sequencing in splenic marginal zone lymphoma reveals mutations in genes involved in marginal zone differentiation. *Leukemia* 28(6):1334-1340.
45. Kiel MJ, *et al.* (2012) Whole-genome sequencing identifies recurrent somatic NOTCH2 mutations in splenic marginal zone lymphoma. *J Exp Med* 209(9):1553-1565.
46. Rossi D, *et al.* (2012) The coding genome of splenic marginal zone lymphoma: activation of NOTCH2 and other pathways regulating marginal zone development. *J Exp Med* 209(9):1537-1551.
47. Chapuy B, *et al.* (2016) Targetable genetic features of primary testicular and primary central nervous system lymphomas. *Blood* 127(7):869-881.
48. Braggio E, *et al.* (2015) Genome-Wide Analysis Uncovers Novel Recurrent Alterations in Primary Central Nervous System Lymphomas. *Clin Cancer Res* 21(17):3986-3994.
49. Vater I, *et al.* (2015) The mutational pattern of primary lymphoma of the central nervous system determined by whole-exome sequencing. *Leukemia* 29(3):677-685.
50. Bruno A, *et al.* (2014) Mutational analysis of primary central nervous system lymphoma. *Oncotarget* 5(13):5065-5075.
51. Mareschal S, *et al.* (2017) Identification of Somatic Mutations in Primary Cutaneous Diffuse Large B-Cell Lymphoma, Leg Type by Massive Parallel Sequencing. *J Invest Dermatol* 137(9):1984-1994.
52. Farmanbar A, *et al.* (2018) Mutational Intratumor Heterogeneity is a Complex and Early Event in the Development of Adult T-cell Leukemia/Lymphoma. *Neoplasia* 20(9):883-893.
53. Dufva O, *et al.* (2018) Aggressive natural killer-cell leukemia mutational landscape and drug profiling highlight JAK-STAT signaling as therapeutic target. *Nat Commun* 9(1):1567.
54. Jallades L, *et al.* (2017) Exome sequencing identifies recurrent BCOR alterations and the absence of KLF2, TNFAIP3 and MYD88 mutations in splenic diffuse red pulp small B-cell lymphoma. *Haematologica* 102(10):1758-1766.

55. da Silva Almeida AC, *et al.* (2015) The mutational landscape of cutaneous T cell lymphoma and Sezary syndrome. *Nat Genet* 47(12):1465-1470.
56. Kataoka K, *et al.* (2015) Integrated molecular analysis of adult T cell leukemia/lymphoma. *Nat Genet* 47(11):1304-1315.
57. Jiang L, *et al.* (2015) Exome sequencing identifies somatic mutations of DDX3X in natural killer/T-cell lymphoma. *Nat Genet* 47(9):1061-1066.
58. Choi J, *et al.* (2015) Genomic landscape of cutaneous T cell lymphoma. *Nat Genet* 47(9):1011-1019.
59. Crescenzo R, *et al.* (2015) Convergent mutations and kinase fusions lead to oncogenic STAT3 activation in anaplastic large cell lymphoma. *Cancer Cell* 27(4):516-532.
60. Moffitt AB, *et al.* (2017) Enteropathy-associated T cell lymphoma subtypes are characterized by loss of function of SETD2. *J Exp Med* 214(5):1371-1386.
61. McKinney M, *et al.* (2017) The Genetic Basis of Hepatosplenic T-cell Lymphoma. *Cancer Discov* 7(4):369-379.
62. Kiel MJ, *et al.* (2015) Genomic analyses reveal recurrent mutations in epigenetic modifiers and the JAK-STAT pathway in Sezary syndrome. *Nat Commun* 6:8470.
63. McGirt LY, *et al.* (2015) Whole-genome sequencing reveals oncogenic mutations in mycosis fungoides. *Blood* 126(4):508-519.
64. Kiel MJ, *et al.* (2014) Integrated genomic sequencing reveals mutational landscape of T-cell prolymphocytic leukemia. *Blood* 124(9):1460-1472.
65. Palomero T, *et al.* (2014) Recurrent mutations in epigenetic regulators, RHOA and FYN kinase in peripheral T cell lymphomas. *Nat Genet* 46(2):166-170.
66. Koo GC, *et al.* (2012) Janus kinase 3-activating mutations identified in natural killer/T-cell lymphoma. *Cancer Discov* 2(7):591-597.
67. Song TL, *et al.* (2018) Oncogenic activation of the STAT3 pathway drives PD-L1 expression in natural killer/T-cell lymphoma. *Blood* 132(11):1146-1158.
68. Woollard WJ, *et al.* (2016) Candidate driver genes involved in genome maintenance and DNA repair in Sezary syndrome. *Blood* 127(26):3387-3397.
69. Wang L, *et al.* (2015) Genomic profiling of Sezary syndrome identifies alterations of key T cell signaling and differentiation genes. *Nat Genet* 47(12):1426-1434.
70. Ungewickell A, *et al.* (2015) Genomic analysis of mycosis fungoides and Sezary syndrome identifies recurrent alterations in TNFR2. *Nat Genet* 47(9):1056-1060.
71. Yoo HY, *et al.* (2014) A recurrent inactivating mutation in RHOA GTPase in angioimmunoblastic T cell lymphoma. *Nat Genet* 46(4):371-375.
72. Sakata-Yanagimoto M, *et al.* (2014) Somatic RHOA mutation in angioimmunoblastic T cell lymphoma. *Nat Genet* 46(2):171-175.
